# Supplementary material
Source: PubMed Central journal article supplement (PMC7987762)
Supplement: NIHMS1668758-supplement-1.pdf [file NIHMS1668758-supplement-1.pdf]

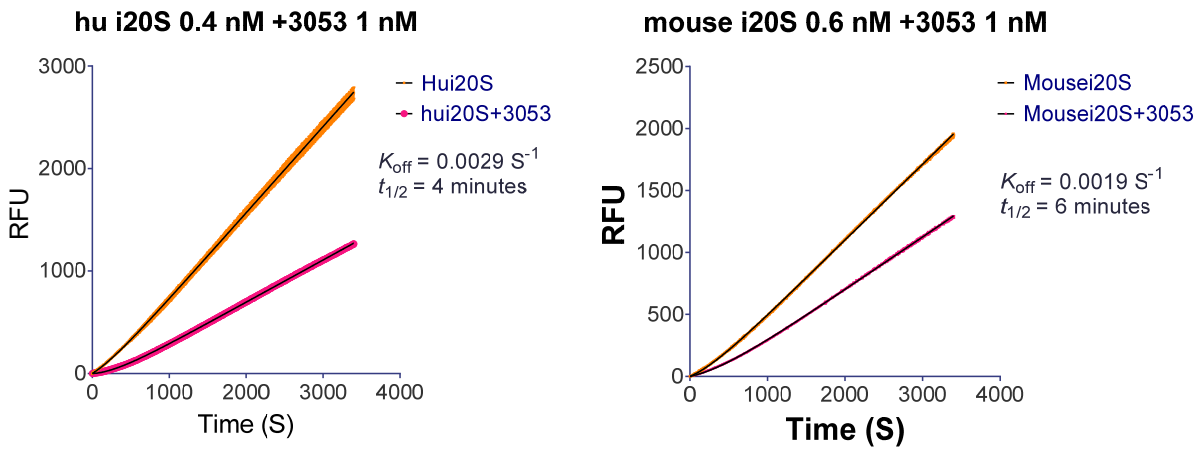

**Figure S1. Time-dependent inhibition of  $\beta$ 5i of hu i20S and mouse i20S by PKS3053, respectively.**

The mixture of i20S (40 nM) and PKS3053 (100 nM) or DMSO at indicated concentrations were incubated for 30 minutes, prior to being diluted 100x into a solution of 25  $\mu$ M of suc-LLVY-AMC in reaction buffer. The fluorescence of hydrolyzed AMC (Ex 360 nm / Em 460 nm) was immediately recorded for 1 hour. The curves were fit to non-linear least square equation that yielded  $k_{off}$  values  $0.0029 \text{ s}^{-1}$  for hu i20S and  $0.0019 \text{ s}^{-1}$  for mouse i20S.

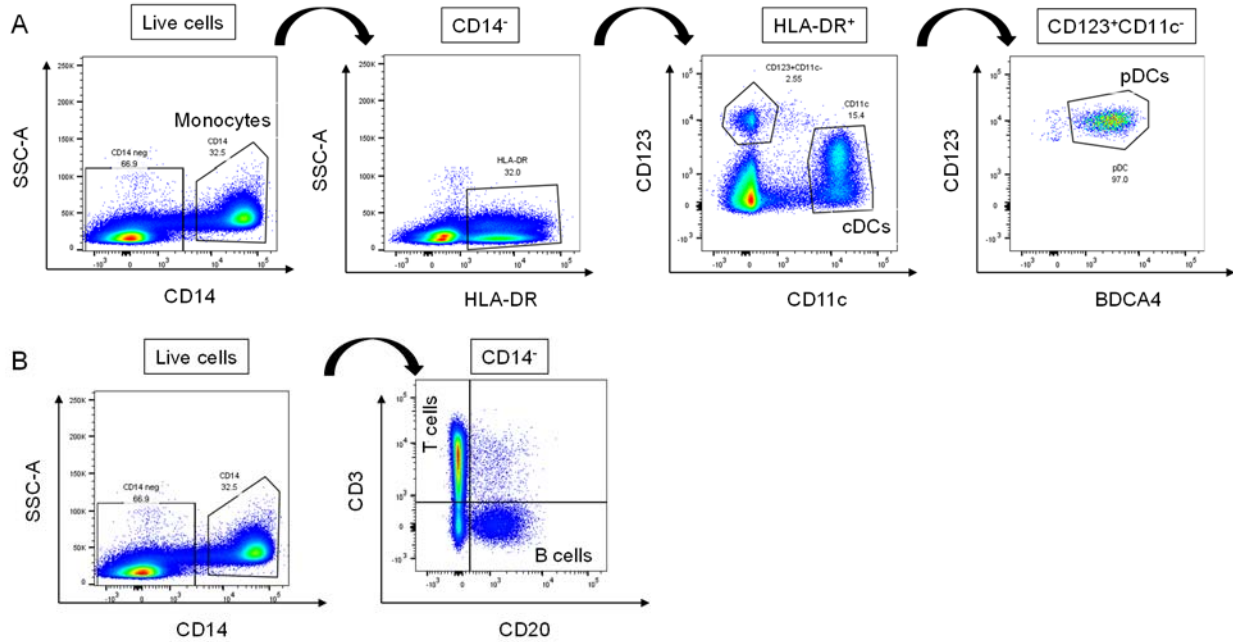

**Figure S2. Gating strategy for the different immune cells within PBMCs.**

PBMCs were prepared from HDs and cells were stained with CD14, HLA-DR, CD11c, CD123, BDCA4, CD3 and CD20 antibodies and analyzed by flow cytometry. (A,B) Representative dot plots of (A) Monocytes, identified as CD14<sup>+</sup> (left panel), pDCs, identified as CD14<sup>-</sup>HLA-DR<sup>+</sup>CD11c<sup>-</sup>CD123<sup>+</sup>BDCA4<sup>+</sup> (right panel), cDCs gated as CD14<sup>-</sup>HLA-DR<sup>+</sup> CD123<sup>-</sup>BDCA4<sup>-</sup>CD11c<sup>+</sup> (middle right panel) and (B) B cells and T cells identified CD14<sup>-</sup>CD20<sup>+</sup> and CD14<sup>-</sup>CD3<sup>+</sup> respectively

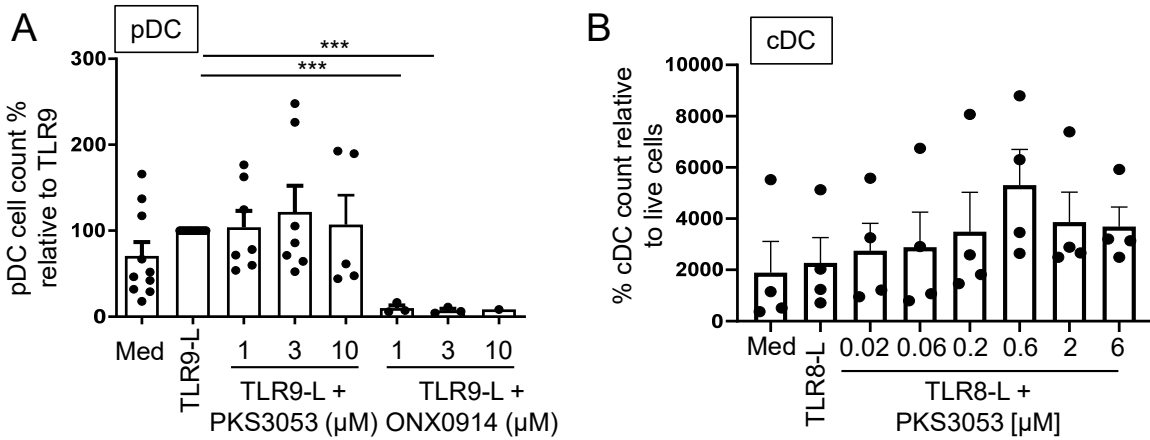

**Figure S3. PK3053, the  $\beta 5i$  specific inhibitor is non-toxic on TLR-induced pDCs and cDCs**

(A) Purified pDCs were cultured for 24h with media alone, with the TLR9 ligand CpG-C274 (0.1  $\mu$ M) or with the TLR9-L and either PK3053 or ONX0914 at the indicated concentration.

The following day, the viability of pDCs was evaluated by flow cytometry (B) cDCs

differentiated from monocytes were cultured for 24h with media alone, with the TLR8 agonist (ORN8-L) or with TLR8-L and PK3053. After 24h, the viability of cDCs was evaluated by

flow cytometry. All results are represented as a mean  $\pm$  SEM and individual donors are shown.

Statistical significance was evaluated using a Mann-Whitney U-test and \* $p \leq 0.05$ ; \*\* $p \leq 0.01$ ;

\*\*\* $p \leq 0.001$

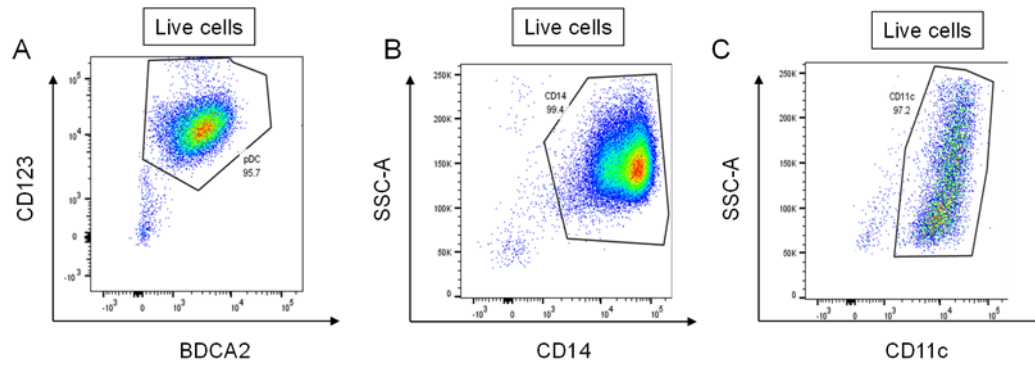

**Figure S4. Gating strategy for purified pDCs, macrophages and cDCs.**

(A) pDCs were purified by positive selection using miltenyi beads and cells were stained with CD123 and BDCA2 antibodies. Representative dot plot of 1 donor which shows that >95.5 % of purified cells are pDCs (B) Macrophages were differentiated from monocytes and cells were stained with CD14 antibody after 5 days. Representative dot plot of 1 donor which shows that >99 % of purified cells are CD14<sup>+</sup>. pDCs (C) cDCs were differentiated from monocytes and cells were stained with CD11c antibody after 7 days. Representative dot plot of 1 donor which shows that >97 % of differentiated cells are cDCs.
